# Supplementary material for: Programmable switching of CRISPR/Cas12a activity by adjusting guide RNA conformation for non-nucleic acid marker analysis and logic gate applications
Source: Royal Society of Chemistry journal article supplement (doi:10.1039/d4nj01502a), 2024-01-01
Supplement: d4nj01502a1.pdf [file d4nj01502a1.pdf]

## Supplementary Information

### Programmable CRISPR/Cas12a Activity by Adjusting Guide RNA Conformation for Non-nucleic Acid Markers Analysis and Logic Gate Applications

*Huihui Wang<sup>a,1</sup>, Zhixue Zhu<sup>a,1</sup>, Huan Pan<sup>a</sup>, Zhiqiang Guo<sup>a</sup>, Mingshuo Zhang<sup>a</sup>, Yanling Meng<sup>a</sup>, Xudong Yue<sup>a</sup>,  
Yu Wang<sup>a</sup>, Su Liu<sup>b</sup>, Jinghua Yu<sup>c</sup> and Jiadong Huang<sup>\*ac</sup>*

<sup>a</sup>School of Biological Sciences and Technology, University of Jinan, Jinan 250022, P.R. China.

<sup>b</sup>School of Water Conservancy and Environment, University of Jinan, Jinan 250022, P.R. China.

<sup>c</sup> Key Laboratory of Chemical Sensing & Analysis in Universities of Shandong, School of Chemistry and Chemical Engineering, University of Jinan, Jinan 250022, P.R. China.

\*Corresponding Author. E-mail: [chm\\_huangjd@ujn.edu.cn](mailto:chm_huangjd@ujn.edu.cn); Tel.: +86-531-89736122; Fax: +86-531-82769122.

## Contents

|                                                                                                              |     |
|--------------------------------------------------------------------------------------------------------------|-----|
| <b>Table S1.</b> DNA oligonucleotides sequences used in this work. ....                                      | S-3 |
| <b>Fig. S1.</b> Effect of length of blocker 1 on the fluorescence signal.. ....                              | S-4 |
| <b>Fig. S2.</b> Optimal experiment. ....                                                                     | S-5 |
| <b>Fig. S3.</b> Schematic illustration of the proposed universal biosensing strategy for GSH detection. .... | S-6 |
| <b>Fig. S4.</b> PAGE characterizes the feasibility of the universal biosensor for GSH detection. ....        | S-6 |
| <b>Fig. S5.</b> Fluorescence spectra of the biosensor obtained upon the different control conditions. ....   | S-7 |
| <b>Fig. S6.</b> Fluorescence intensity of “AND” logic gate and “OR” logic gate. ....                         | S-7 |
| <b>Fig. S7.</b> Fluorescence intensity characterization of arbitrary logic gate. ....                        | S-7 |
| <b>Table S2.</b> Comparison of different methods for ATP determination. ....                                 | S-8 |
| <b>References.</b> .....                                                                                     | S-8 |

**Table S1.** DNA oligonucleotides sequences used in this work.

| Oligonucleotide name | Sequence (5' to 3') description                        |
|----------------------|--------------------------------------------------------|
| crRNA                | UAAUUUCUACUAAGUGUAGAUGGUUGAUAACUAAACCUGG<br>G          |
| Apt-T1               | <u>ACCTGGGGGAGTACCAAGTACGAA</u>                        |
| Apt-T2               | TAATTTCTACT <u>GGTGCGGAGGAAGGT</u>                     |
| blocker1             | <i>TTCG</i> TA <sup>CT</sup> TA <sup>GT</sup> AGAAATTA |
| blocker2             | TACACTT/iHS-SH/AGTAGAA                                 |
| blocker2a            | TACACTTAGTAGAA                                         |
| blocker3             | TACACTTA8oxo-GTAGAAA                                   |
| blocker3a            | TACACTTAGTAGAAA                                        |
| S                    | CCCAGGTTTAGTTATCAACC                                   |
| FQ                   | <i>FAM</i> -TTATT- <i>BHQ</i>                          |
| blocker1a            | <i>TTCG</i> TCTACTTAGTAGAAATTA                         |
| blocker1b            | <i>TTCG</i> TCTACTTAGTAGAAATTA                         |
| blocker1c            | <i>TTCG</i> TTTAGTAGAAATTA                             |
| Apt-T1a              | <u>ACCTGGGGGAGTACCAAGTGTAGACGAA</u>                    |
| Apt-T1b              | <u>ACCTGGGGGAGTACCAAGTAGACGAA</u>                      |
| Apt-T1c              | <u>ACCTGGGGGAGTACCAAACGAA</u>                          |
| ATP G1               | CTAA <u>ACCTGGGGGAGTATTGCGGAGGAAGGT</u>                |
| ATP G2               | <u>ACCTGGGGGAGTATTGCGGAGGAAGGTTGATAA</u>               |

The underlined part of Apt-T1 and Apt-T2 is the split aptamer of ATP, the underlined part of ATP G1 and ATP G2 is the complete aptamer of ATP. The middle of the blocker 2 was decorated with the disulfide bond (iHS-SH). The middle of the blocker 3 was decorated with the 8-oxoadenine (8oxo-G). The 3' and 5' ends of FQ were modified with FAM and BHQ, respectively.

crRNA 5'-UAAUUUCUACUAAGUGUAGAU~~GGUUGAUAACUAAACCUGGG~~-3'

19nt 3'-ATTAAAGATGATTCACATCTGCTT-5'

17nt 3'-ATTAAAGATGATTCACATGCTT-5'

15nt 3'-ATTAAAGATGATTCATGCTT-5'

13nt 3'-ATTAAAGATGATTGCTT-5'

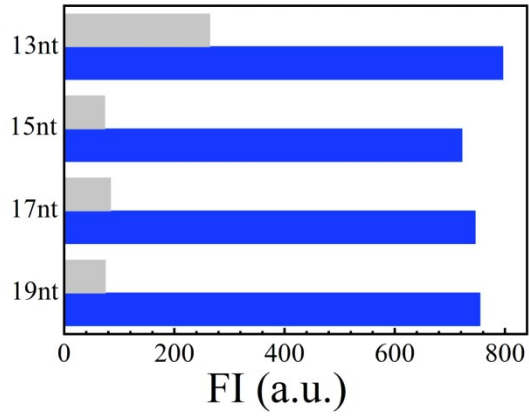

**Fig. S1.** Effect of length of blocker 1 on the fluorescence signal. 13, 15, 17, 19 nt blocker 1 was used. Gray: fluorescence background signal intensity without adding the target; Blue: The intensity of the fluorescent signal when the target is added.

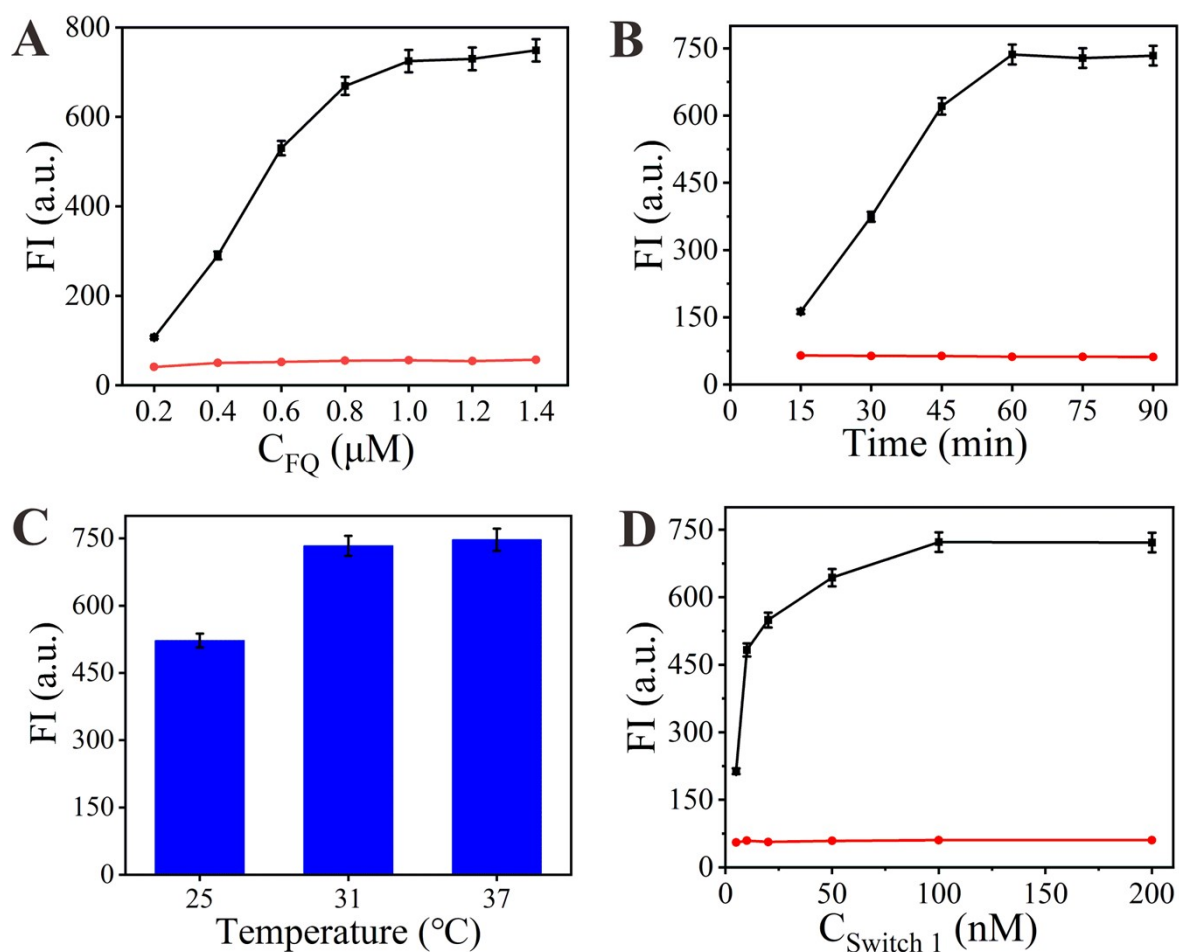

**Fig. S2.** Optimal experiment. (A) Effect of the concentration of FQ on the fluorescence signal of the biosensor in the presence (black) and absence (red) of 10  $\mu\text{M}$  ATP. (B) Effect of the reaction time on the fluorescence signal of the biosensor in the presence (black) and absence (red) of 10  $\mu\text{M}$  ATP. (C) Effect of the reaction temperature on the fluorescence signal of the biosensor. (D) Effect of the concentration of Switch 1 on the fluorescence signal of the biosensor in the presence (black) and absence (red) of 10  $\mu\text{M}$  ATP.

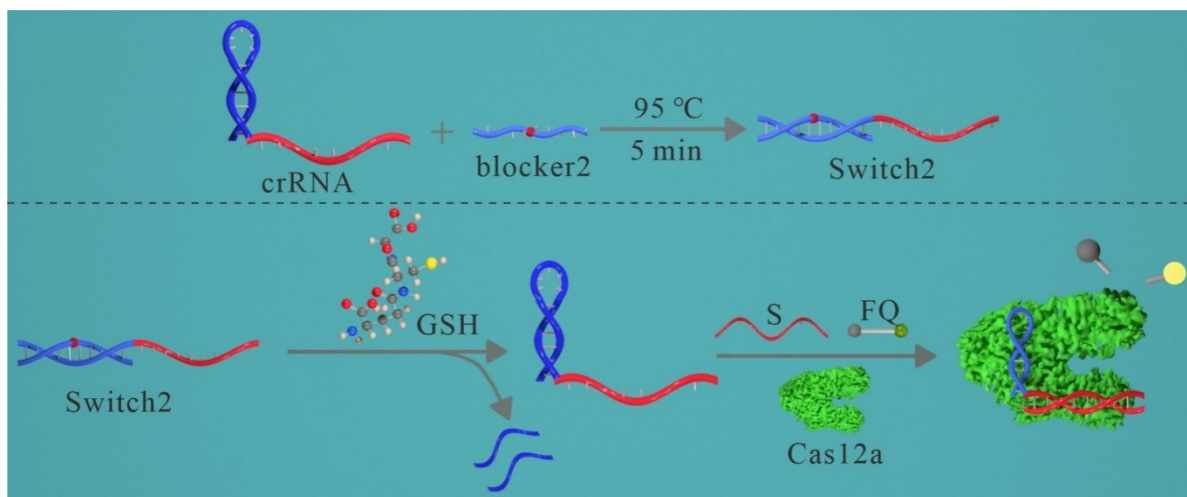

**Fig. S3.** Schematic illustration of the proposed universal biosensing strategy for GSH detection.

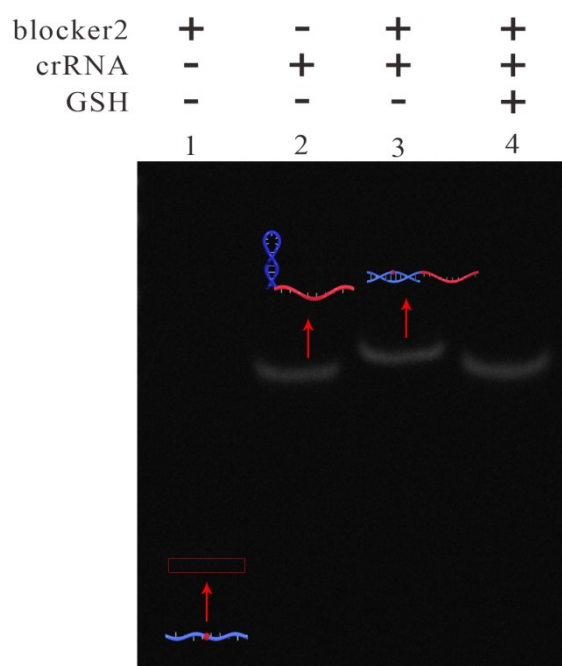

**Fig. S4.** PAGE characterizes the feasibility of the universal biosensor for GSH detection.

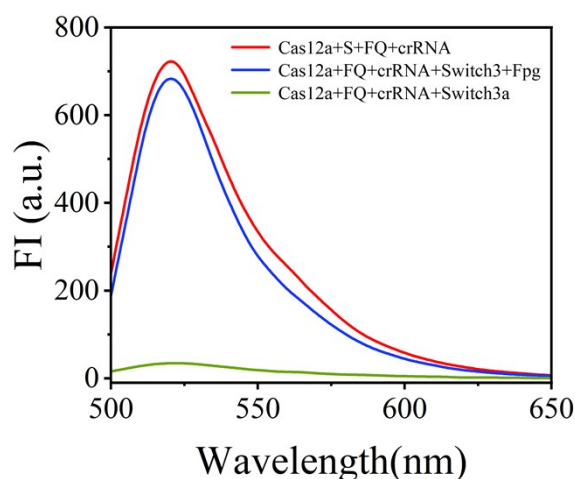

**Fig. S5.** Fluorescence spectra of the biosensor obtained upon the different control conditions.

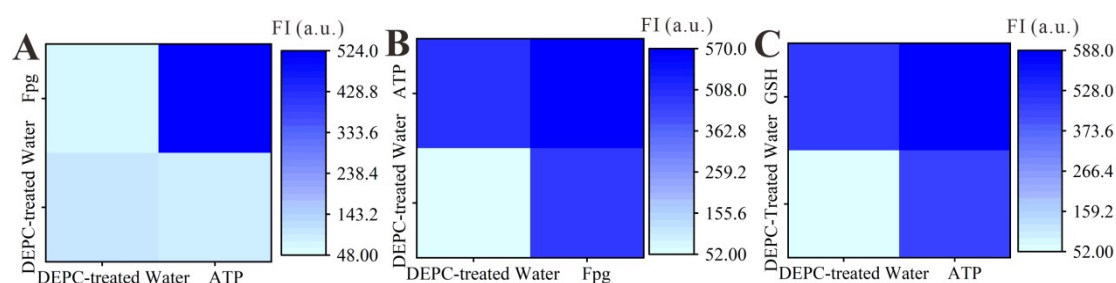

**Fig. S6.** Fluorescence intensity of “AND” logic gate and “OR” logic gate. (A) Fluorescence intensity of “AND” logic gate with ATP and Fpg as inputs. (B) Fluorescence intensity of “OR” logic gate with ATP and Fpg as inputs. (C) Fluorescence intensity of “OR” logic gate with ATP and GSH as inputs.

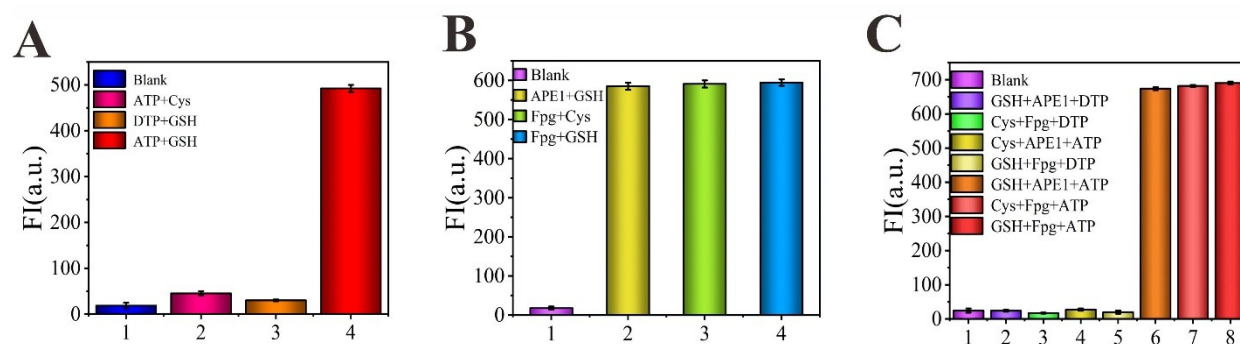

**Fig. S7.** The feasibility validation of this approach to implement an arbitrary logic circuit. (A) The fluorescent peak intensity of the “AND” logic gate by varying different input units. (B) The fluorescent peak intensity of the “OR” logic gate by varying different input units. (C) The fluorescent peak intensity of the three-input two-layered logic gate by varying different input units.

**Table S2.** Comparison of different methods for ATP determination.

| Detection methods        | LOD( $\mu\text{M}$ ) | Detection range( $\mu\text{M}$ ) | References |
|--------------------------|----------------------|----------------------------------|------------|
| Fluorescence             | 19                   | 125-2000                         | [1]        |
| Fluorescence             | 2                    | 5-2500                           | [2]        |
| Fluorescence             | 1                    | 5-600                            | [3]        |
| Colorimetric             | 0.1225               | 0.2-3                            | [4]        |
| Electrochemiluminescence | 0.64                 | 0.64-1000                        | [5]        |
| Fluorescence             | 0.046                | 0-12.8                           | This work  |

## References

1. Liu, Z., et al., Intracellular Detection of ATP Using an Aptamer Beacon Covalently Linked to Graphene Oxide Resisting Nonspecific Probe Displacement. *Analytical Chemistry*, 2014. **86**(24): p. 12229-12235.
2. He, Y., et al., Low background signal platform for the detection of ATP: When a molecular aptamer beacon meets graphene oxide. *Biosensors and Bioelectronics*, 2011. **29**(1): p. 76-81.
3. Pan, Q., et al., A Novel Fluorescent Probe for ATP Detection Based on Synergetic Effect of Aggregation-induced Emission and Counterion Displacement. *Chemical Research in Chinese Universities*, 2021. **37**(1): p. 166-170.
4. Lu, S., et al., Enzyme-free aptamer/AuNPs-based fluorometric and colorimetric dual-mode detection for ATP. *Sensors and Actuators B: Chemical*, 2018. **265**: p. 67-74.
5. Liu, Z., et al., Label-Free and Signal-On Electrochemiluminescence Aptasensor for ATP Based on Target-Induced Linkage of Split Aptamer Fragments by Using  $[\text{Ru}(\text{phen})_3]^{2+}$  Intercalated into Double-Strand DNA as a Probe. 2010. **16**(45): p. 13356-13359.
